# Supplementary material for: Finding the most appropriate mouse model of juvenile CLN3 (Batten) disease for therapeutic studies: the importance of genetic background and gender
Source: PubMed Central journal article supplement (PMC4381334; doi:10.1242/dmm.018804), 2015-04
Supplement: supp_8.4.351_DMM018804.pdf [file supp_8.4.351_DMM018804.pdf]

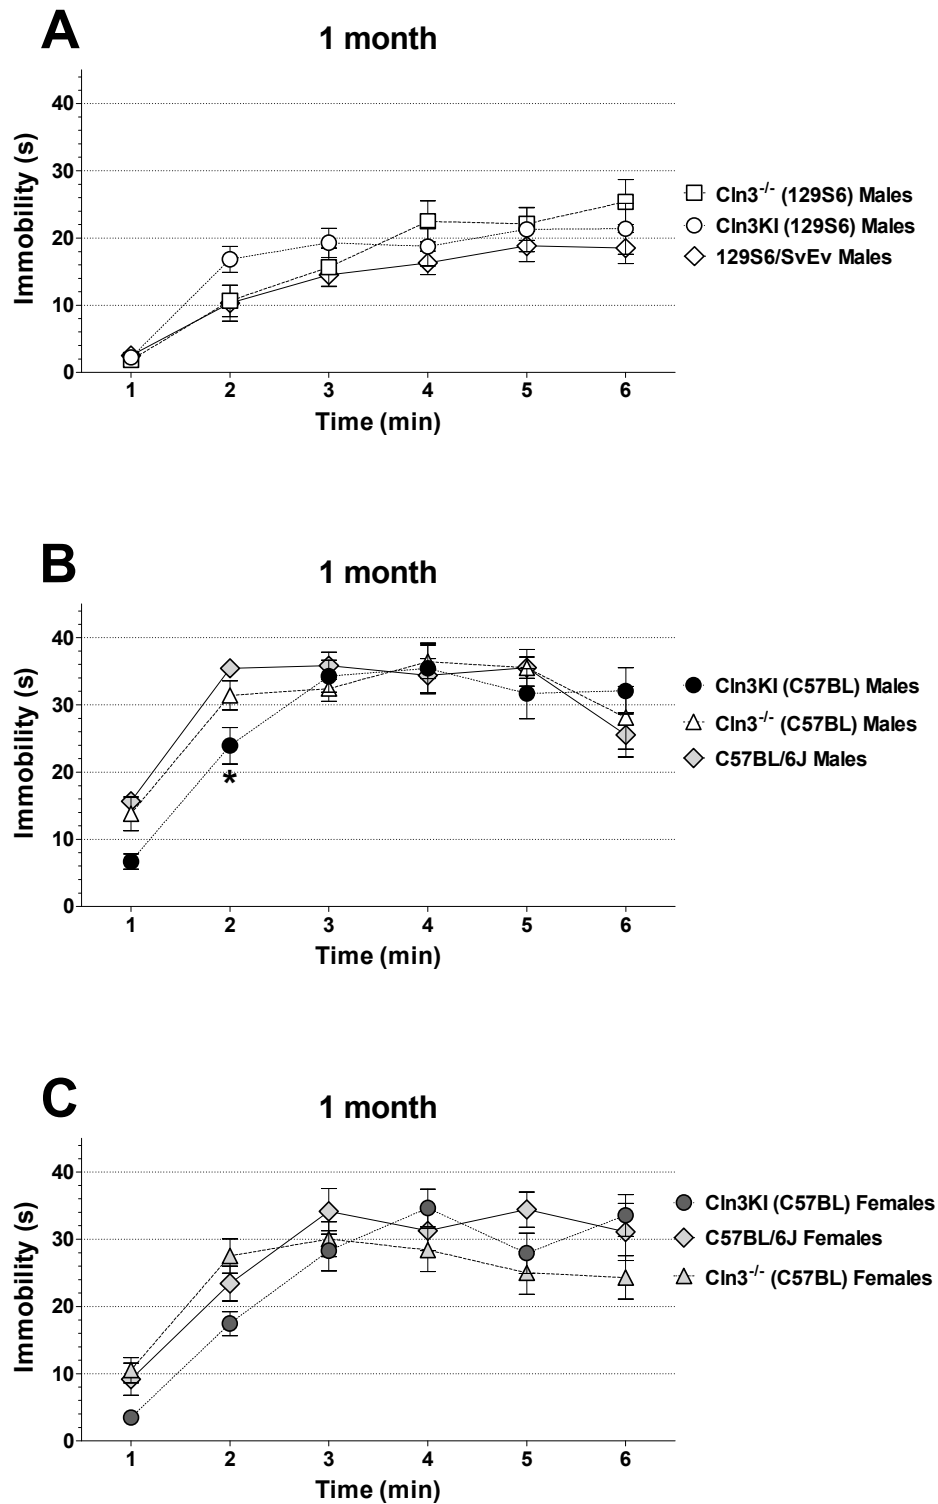

**Supplementary Fig. 1. Similarities in the time course of immobility at 1 month of age.** One-month-old mice were suspended by their tail 45 cm above table level, and the duration of immobility was measured in 1 minute bins for 6 minutes. Symbols and bars represent mean  $\pm$  SEM (n=10-12).

Statistical significance was analyzed by repeated measures 2-way ANOVA with Bonferroni's post-test for pairwise multiple comparisons. **(A)** *Cln3*<sup>-/-</sup> and *Cln3* <sup>$\Delta$ ex7/8</sup>-knock-in (Cln3KI) males on the 129S6/SvEv background, and 129S6/SvEv WT males had very similar time course of immobility. **(B)** *Cln3*<sup>-/-</sup> and *Cln3* <sup>$\Delta$ ex7/8</sup>-knock-in (Cln3KI) males on the C57BL/6J background, and C57BL/6J WT males had similar time course of immobility. The only difference between *Cln3* <sup>$\Delta$ ex7/8</sup>-knock-in (Cln3KI) and C57BL/6J WT males was in the 2<sup>nd</sup> minute of the test (\*p<0.05). **(C)** *Cln3*<sup>-/-</sup> and *Cln3* <sup>$\Delta$ ex7/8</sup>-knock-in (Cln3KI) females on the C57BL/6J background, and C57BL/6J WT females had similar time course of immobility.

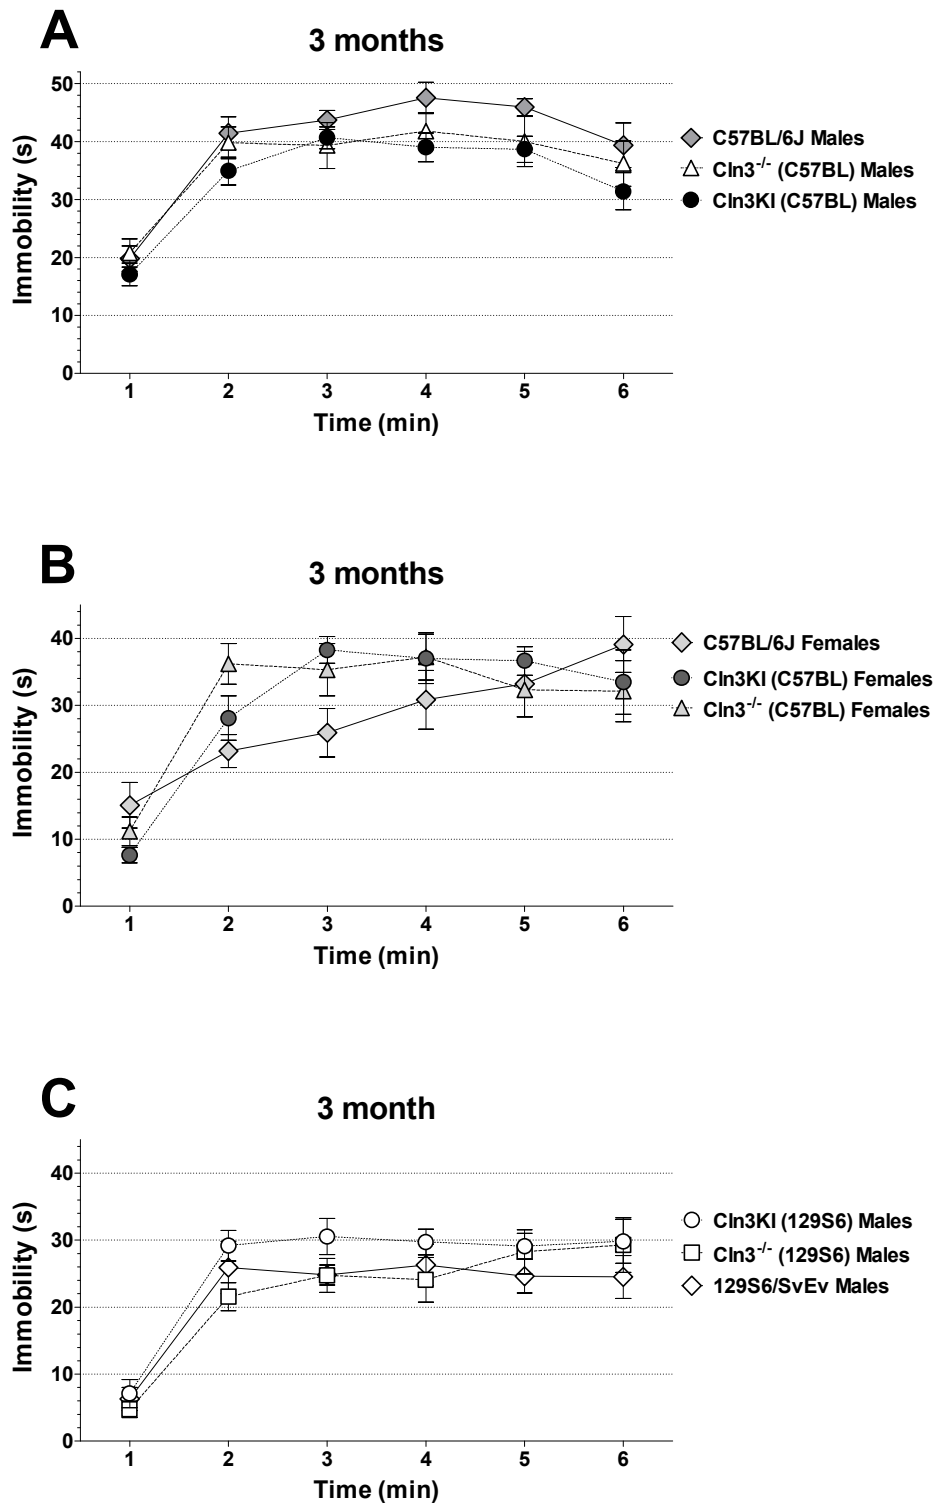

**Supplementary Fig. 2. Similarities in the time course of immobility at 3 months of age.** Three-month-old mice were suspended by their tail 45 cm above table level, and the duration of immobility was measured in 1 minute bins for 6 minutes. Symbols and bars represent mean  $\pm$  SEM (n=10-12).

Statistical significance was analyzed by repeated measures 2-way ANOVA with Bonferroni's post-test for pairwise multiple comparisons. **(A)** *Cln3*<sup>-/-</sup> and *Cln3*<sup>Δex7/8</sup>-knock-in (Cln3KI) males on the C57BL/6J background, and C57BL/6J WT males had very similar time course of immobility **(B)** *Cln3*<sup>-/-</sup> and *Cln3*<sup>Δex7/8</sup>-knock-in (Cln3KI) females on the C57BL/6J background, and C57BL/6J WT females had similar time course of immobility. **(C)** *Cln3*<sup>-/-</sup> and *Cln3*<sup>Δex7/8</sup>-knock-in (Cln3KI) males on the 129S6/SvEv background, and 129S6/SvEv WT males had very similar time course of immobility.

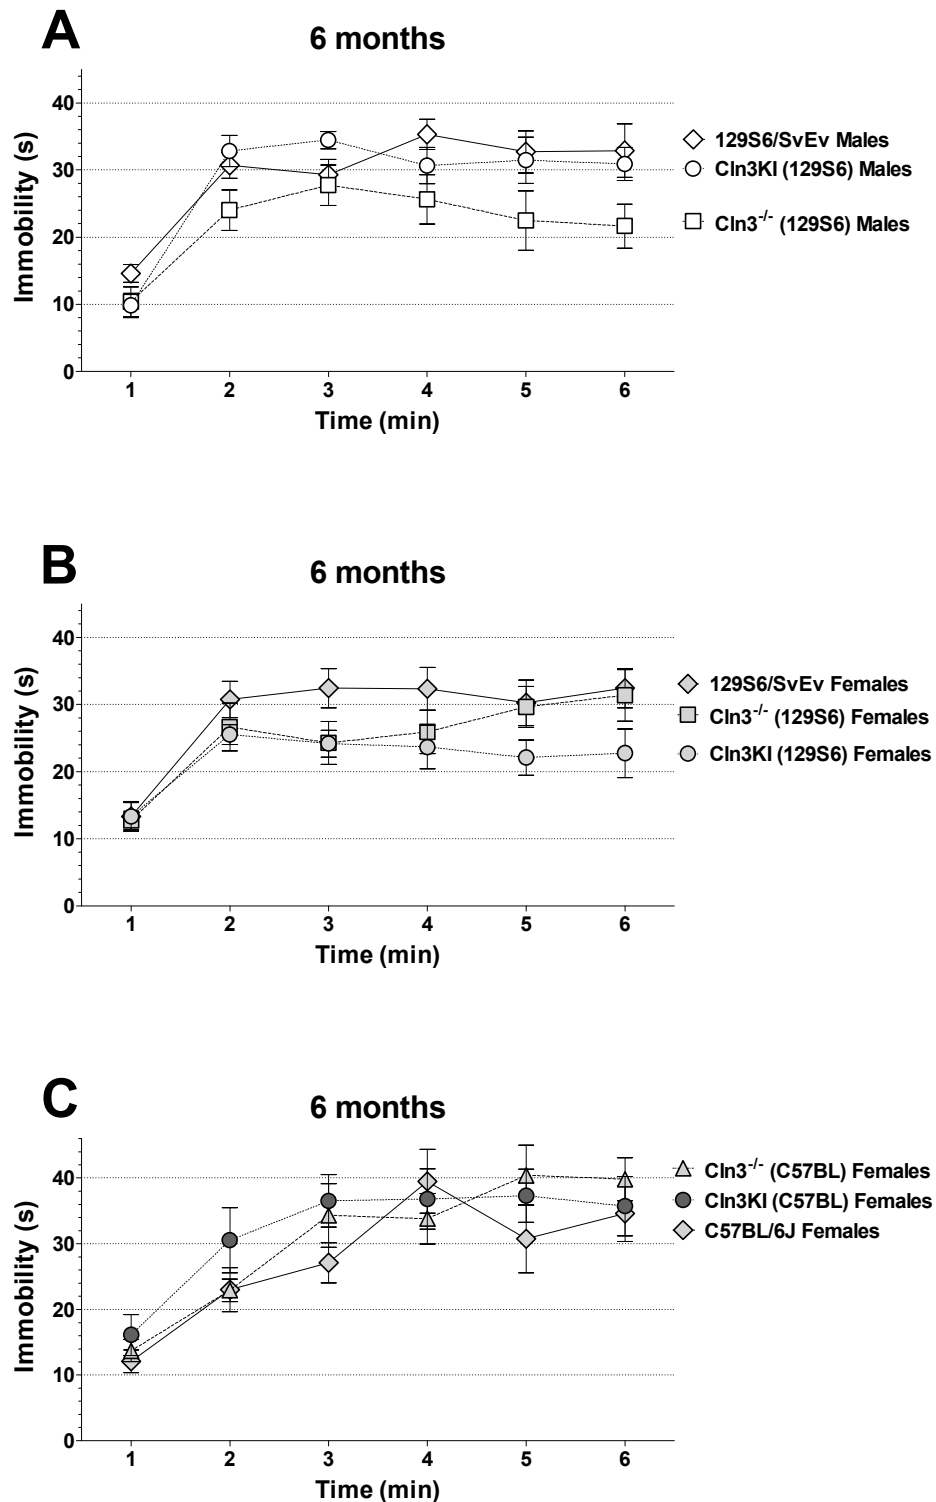

**Supplementary Fig. 3. Similarities in the time course of immobility at 6 months of age.** Six-month-old mice were suspended by their tail 45 cm above table level, and the duration of immobility was measured in 1 minute bins for 6 minutes. Symbols and bars represent mean  $\pm$  SEM (n=10-12).

Statistical significance was analyzed by repeated measures 2-way ANOVA with Bonferroni's post-test for pairwise multiple comparisons. **(A)**  $Cln3^{-/-}$  and  $Cln3^{Aex7/8}$ -knock-in (Cln3KI) males on the 129S6/SvEv background, and 129S6/SvEv WT males had similar time course of immobility. **(B)**  $Cln3^{-/-}$  and  $Cln3^{Aex7/8}$ -knock-in (Cln3KI) females on the 129S6/SvEv background, and 129S6/SvEv WT females had similar time course of immobility. **(C)**  $Cln3^{-/-}$  and  $Cln3^{Aex7/8}$ -knock-in (Cln3KI) females on the C57BL/6J background, and C57BL/6J WT females had very similar time course of immobility.

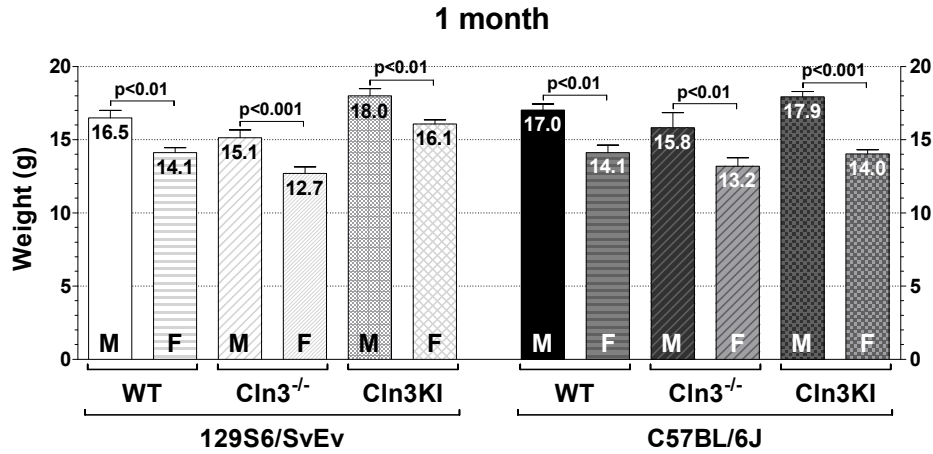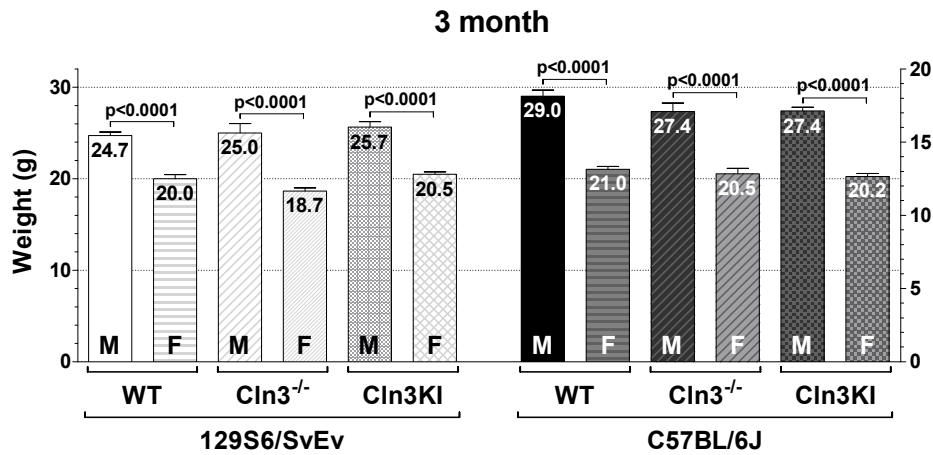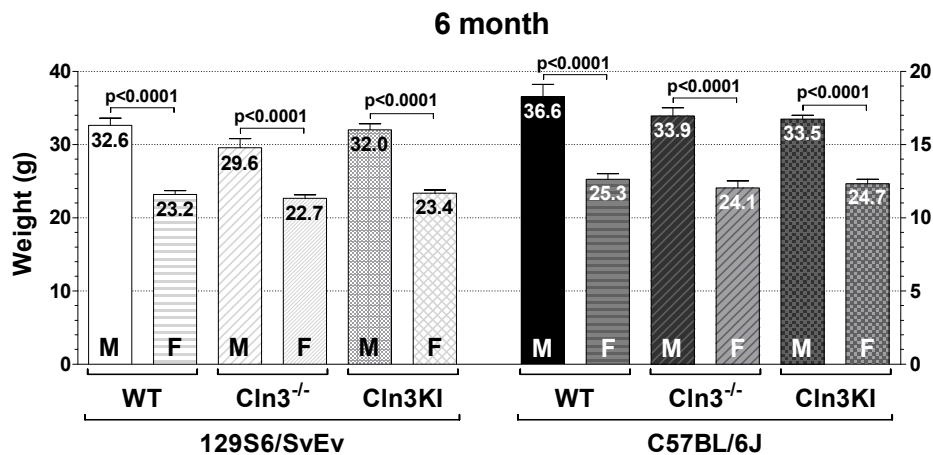

**Supplementary Fig. 4. Males are always heavier than females independently of the genotype, genetic background and age. The weight of male (M) and female (F) mice used in the behavioral tests was measured. The same mice were weighed at 1, 3 and 6 months of age. Columns and bars**

represent mean  $\pm$  SEM (n=10-12). Statistical significance was determined by 1-way ANOVA with Bonferroni's post-test for multiple comparisons.



Supplementary Table 1. Genome scanning analysis of representative mice.

|                |         | % C57BL/6 | 0.6%                            | 0.6%     | 0.6%   | 0.6%   | 2.5%                               | 2.5%   | 2.5%     | 2.2%     | 99.4%                           | 99.4%  | 99.4%    | 99.4%    | 98.1%                              | 98.1%  | 98.1%    | 98.1%    |
|----------------|---------|-----------|---------------------------------|----------|--------|--------|------------------------------------|--------|----------|----------|---------------------------------|--------|----------|----------|------------------------------------|--------|----------|----------|
| SNP_ID         |         | % 129     | 99.4%                           | 99.4%    | 99.4%  | 99.4%  | 97.5%                              | 97.5%  | 97.5%    | 97.8%    | 0.6%                            | 0.6%   | 0.6%     | 0.6%     | 1.9%                               | 1.9%   | 1.9%     | 1.9%     |
|                |         |           | Cln3 <sup>-/-</sup> on 129/SvEv |          |        |        | Cln3 <sup>Δex7/8</sup> on 129/SvEv |        |          |          | Cln3 <sup>-/-</sup> on C57BL/6J |        |          |          | Cln3 <sup>Δex7/8</sup> on C57BL/6J |        |          |          |
| Chromosome-bp  | C57BL/6 | 129       | female 1                        | female 2 | male 1 | male 2 | male 1                             | male 2 | female 1 | female 2 | male 1                          | male 2 | female 1 | female 2 | male 1                             | male 2 | female 1 | female 2 |
| 01-005230167-M | C       | T         | T                               |          | T      | T      | T                                  | T      | T        | T        | C                               | C      | C        | C        | C                                  | C      | C        | C        |
| 01-026072256-M | G       | T         | T                               | T        | T      | T      | T                                  | T/G    | T/G      | T        | G                               | G      | G        | G        | G                                  | G      | G        | G        |
| 01-046003967-M | A       | C         | C                               | C        | C      | C      | C                                  | C      | C        | C        | A                               | A      | A        | A        | A                                  | A      | A        | A        |
| 01-065042402-M | G       | A         | A                               | A        | A      | A      | A                                  | A      | A        | A        | G                               | G      | G        | G        | G                                  | G      | G        | G        |
| 01-086182722-M | A       | G         | G                               | G        | G      | G      | G                                  | G      | G        | G        | A                               | A      | A        | A        | G                                  | G/A    | G/A      | G        |
| 01-102073421-M | G       | C         | C                               | C        | C      | C      | C                                  | C      | C        | C        | G                               | G      | G        | G        | G                                  | C/G    | C/G      | G        |
| 01-122978406-M | G       | T         | T                               | T        | T      | T      | T                                  | T      | T        | T        | G                               | G      | G        | G        | G                                  | G      | G        | G        |
| 01-143006008-M | A       | G         | G                               | G        | G      | G      | G                                  | G      | G        | G        | A                               | A      | A        | A        | A                                  | A      | A        | A        |
| 01-162977516-M | G       | A         | A                               | A        | A      | A      | A                                  | A      | A        | A        | G                               | G      | G        | G        | G                                  | G      | G        | G        |
| 01-178701443-M | A       | G         | G                               | G        | G      | G      | G                                  | G      | G        | G        | A                               | A      | A        | A        | A                                  | A      | A        | A        |
| 01-193173300-M | G       | A         | A                               | A        | A      | A      | A                                  | A      | A        | A        | G                               | G      | G        | G        | G                                  | G      | G        | G        |
| 02-003179310-M | G       | A         | A                               | A        | A      | A      | A                                  | A      | A        | A        | G                               | G      | G        | G        | G                                  | G      | G        | G        |
| 02-020551513-M | A       | G         | G                               | G        | G      | G      | A                                  | A      | A        | G/A      | A                               | A      | A        | A        | A                                  | A      | A        | A        |
| 02-041042651-M | C       | G         | G                               | G        | G      | G      | G                                  | G      | G        | G        | C                               | C      | C        | C        | C                                  | C      | C        | C        |
| 02-061161692-M | T       | C         | C                               | C        | C      | C      | C                                  | C      | C        | C        | T                               | T      | T        | T        | T                                  | T      | T        | T        |
| 02-078062303-M | T       | G         | G                               | G        | G      | G      | G                                  | G      | G        | G        | T                               | T      | T        | T        | T                                  | T      | T        | T        |
| 02-101074874-M | A       | G         | G                               | G        | G      | G      | G                                  | G      | G        | G        | A                               | A      | A        | A        | A                                  | A      | A        |          |
| 02-119931810-M | A       | T         | T                               | T        | T      | T      | T                                  | T      | T        | T        | A                               | A      | A        | A        | A                                  | A      | A        | A        |
| 02-139603599-M | T       | A         | A                               | A        | A      | A      | A                                  | A      | A        | A        | T                               | T      | T        | T        | T                                  |        | T        | T        |
| 02-161858323-M | C       | A         | A                               | A        | A      | A      | A                                  | A      | A        | A        | C                               | C      | C        | C        | C                                  | C      |          | C        |
| 02-179086475-M | G       | T         | T                               | T        | T      | T      | T                                  | T      | T        | T        | G                               | G      | G        | G        | G                                  | G      | G        | G        |
| 03-011350737-M | G       | C         | C                               | C        | C      | C      | C                                  | C      | C        | C        | G                               | G      | G        | G        | G                                  |        | G        | G        |
| 03-032431792-M | G       | A         | A                               | A        | A      | A      | A                                  | A      |          | A        | G                               | G      | G        | G        | G                                  | G      | G        | G        |
| 03-053161686-M | T       | C         | C                               | C        | C      | C      | C                                  | C      | C        | C        | T                               | T      | T        | T        | T                                  | T      | T        | T        |
| 03-073214161-M | A       | T         | T                               | T        | T      | T      | T                                  | T      | T        | T        | A                               | A      | A        | A        | A                                  | A      | A        | A        |
| 03-088155864-N | T       | C         | C                               | C        | C      | C      | C                                  | C      | C        | C        | T                               | T      | T        | T        | T                                  | T      | T        | T        |
| 03-110268748-M | C       | T         | T                               | T        | T      | T      | T                                  | T      | T        | T        | C                               | C      | C        | C        | C                                  | C      | C        | C        |
| 03-131286062-N | C       | T         | T                               | T        | T      | T      | T                                  | T      | T        | T        | C                               | C      | C        | C        | C                                  | C      | C        | C        |
| 03-151125653-M | A       | T         | T                               | T        | T      | T      | T                                  | T      | T        | T        | A                               | A      | A        | A        | A                                  | A      | A        | A        |
| 03-160287200-M | G       | A         | A                               | A        | A      | A      | A                                  | A      | A        | A        | G                               | G      | G        | G        | G                                  | G      | G        | G        |
| 04-003163167-M | G       | T         | T                               | T        | T      | T      | T                                  | T      | T        | T        | G                               | G      | G        | G        | G                                  | G      | G        | G        |
| 04-022875524-M | C       | T         | T                               | T        | T      | T      | T                                  | T      | T        | T        | C                               | C      | C        | C        | C                                  | C      | C        | C        |
| 04-039199957-M | C       | G         | G                               | G        | G      | G      | G                                  | G      | G        | G        | C                               | C      | C        | C        | C                                  | C      | C        | C        |
| 04-061409675-M | G       | T         | T                               | T        | T      | T      | T                                  | T      | T        | T        | G                               | G      | G        | G        | G                                  | G      | G        | G        |
| 04-084241978-M | T       | C         | C                               | C        | C      | C      | C                                  | C      | C        | C        | T                               | T      | T        | T        | T                                  | T      | T        | T        |
| 04-106314110-M | C       | A         | A                               | A        | A      | A      | A                                  | A      | A        | A        | C                               | C      | C        | C        | C                                  | C      | C        | C        |
| 04-120122875-M | G       | A         | A                               | A        | A      | A      | A                                  | A      | A        | A        | G                               | G      | G        | G        | G                                  | G      | G        | G        |
| 04-141084977-M | A       | G         | G                               | G        | G      | G      | G                                  | G      | G        | G        | A                               | A      | A        | A        | A                                  | A      | A        | A        |
| 04-151168886-M | G       | T         | T                               | T        | T      | T      | T                                  | T      | T        | T        | G                               | G      | G        | G        | G                                  | G      | G        | G        |
| 05-003188964-M | C       | T         | T                               | T        | T      | T      | T                                  | T      | T        | T        | C                               | C      | C        | C        | C                                  | C      | C        | C        |
| 05-023890459-M | C       | G         | G                               | G        | G      | G      | G                                  | G      | G        | G        | C                               | C      | C        | C        | C                                  | C      | C        | C        |
| 05-044010971-M | T       | G         | G                               | G        | G      | G      | T                                  | G/T    | G/T      | T        | T                               | T      | T        | T        | T                                  | T      | T        | T        |
| 05-065734378-N | A       | G         | G                               | G        | G      | G      | G                                  | G      | G        | G        | A                               | A      | A        | A        | A                                  | A      | A        | A        |
| 05-082050497-M | C       | A         | A                               | A        | A      | A      | A                                  | A      | A        | A        | C                               | C      | C        | C        | C                                  | C      | C        | C        |
| 05-106058057-M | T       | C         | C                               | C        | C      | C      | C                                  | C      | C        | C        | T                               | T      | T        | T        | T                                  | T      | T        | T        |
| 05-125054661-M | T       | C         | C                               | C        | C      | C      | C                                  | C      | C        | C        | T                               | T      | T        | T        | T                                  | T      | T        | T        |
| 05-139966164-M | T       | C         | C                               | C        | C      | C      | C                                  | C      | C        | C        | T                               | T      | T        | T        | T                                  | T      | T        | T        |

|                |   |   |   |   |   |   |   |   |   |   |   |   |   |   |   |   |   |   |
|----------------|---|---|---|---|---|---|---|---|---|---|---|---|---|---|---|---|---|---|
| 05-149044358-M | C | A | A | A | A | A | A | A | A | A | C | C | C | C | C | C | C | C |
| 06-003167392-M | C | T | T | T | T | T | T | T | T | T | C | C | C | C | C | C | C | C |
| 06-017592278-N | G | T | T | T | T | T | T | T | T | T | G | G | G | G | G |   | G | G |
| 06-045126062-M | A | G | G | G | G | G | G | G | G | G | A | A | A | A | A | A | A | A |
| 06-062599520-M | A | G | G | G | G | G | G | G | G | G | A | A | A | A | A | A | A | A |
| 06-083216741-M | G | T | T | T | T | T | T | T | T | T | G | G | G | G | G | G | G | G |
| 06-106057600-M | C | T | T | T | T | T | T | T | T | T | C | C | C | C | C | C | C | C |
| 06-122941044-M | T | A | A | A | A | A | A | A | A | A | T | T | T | T | T | T | T | T |
| 06-135955068-M | C | A | A | A | A | A | A | A | A | A | C | C | C | C | C | C | C | C |
| 06-149052281-M | C | G | G | G | G | G | G | G | G | G | C | C | C | C | C | C | C | C |
| 07-004201219-N | A | G | G | G | G | G | G | G | G | G | A | A | A | A | A | A | A | A |
| 07-022997618-M | C | T | C | C | C | C | C | C | C | C | C | C | C | C | C | C | C | C |
| 07-044964980-M | G | C | C | C | C | C | C | C | C | C | G | G | G | G | G | G | G | G |
| 07-064095712-M | G | T | T |   | T | T | T | T | T | T | G | G | G | G | G | G | G | G |
| 07-085095955-M | C | T | T |   | T | T | T | T | T | T | C | C | C | C | C | C | C | C |
| 07-106153798-M | G | T | T | T | T | T | T | T | T | T | T | T | T | T | T | T | T | T |
| 07-135024189-M | C | T | T | T | T | T | C | C | C | C | C | C | C | C | C | C | C | C |
| 08-003089774-M | T | C | C | C | C | C | C | C | C | C | T | T | T | T | T | T | T | T |
| 08-025034424-M | C | T | T | T | T | T | T | T | T | T | C | C | C | C | C | C | C | C |
| 08-045080531-M | T | C | C | C | C | C | C | C | C | C | T | T | T | T | T | T | T | T |
| 08-067470102-N | G | C | C | C | C | C | C | C | C | C | G | G | G | G | G | G | G | G |
| 08-086985036-M | C | T | T | T | T | T | T | T | T | T | C | C | C | C | C | C | C | C |
| 08-107088585-M | A | G | G | G | G | G | G | G | G | G | A | A | A | A | A | A | A | A |
| 08-123021323-M | T | C | C | C | C | C | C | C | C | C | T | T | T | T | T | T | T | T |
| 09-003938578-M | T | C | C | C | C | C | C | C | C | C | T | T | T | T | T | T | T | T |
| 09-016198772-M | G | T | T | T | T | T | T | T | T | T | G | G | G | G | G | G | G | G |
| 09-034961903-M | G | A | A | A | A | A | A | A | A | A | G | G | G | G | G | G | G | G |
| 09-052894456-M | C | A | A | A | A | A | A | A | A | A | C | C | C | C | C | C | C | C |
| 09-077792491-M | T | A | A | A | A | A | A | A | A | A | T | T | T | T | T | T | T | T |
| 09-098865563-M | T | C | C | C | C | C | C | C | C | C | T | T | T | T | T | T | T | T |
| 09-115037423-M | G | A | A | A | A | A | A | A | A | A | G | G | G | G | G | G | G | G |
| 09-125082704-M | G | A | A | A | A | A | A | A | A | A | G | G | G | G | G | G | G | G |
| 10-003233934-M | G | C | C | C | C | C | C | C | C |   | G | G | G | G | G | G | G | G |
| 10-023127952-M | A | G | G | G | G | G | G | G | G | G | A | A | A | A | A | A | A | A |
| 10-034328321-G | C | A | A | A | A | A | A | A | A | A | C | C | C | C | C | C | C | C |
| 10-053898997-M | G | C | C | C | C | C | C | C | C | C | G | G |   | G | G | G | G | G |
| 10-072471838-G | A | G | G | G | G | G | G | G | G | G | A | A | A | A | A | A | A | A |
| 10-093476458-N | T | C | C | C | C | C | C | C | C | C | T | T | T | T | T | T | T | T |
| 10-117629082-M | A | G | G | G | G | G | G | G | G | G | A | A | A | A | A | A | A | A |
| 10-129117100-M | G | A | A | A | A | A | A | A | A | A | G | G | G | G | G | G | G | G |
| 11-005661856-N | T | A | A | A | A | A | A | A | A | A | T | T | T | T | T |   | T | T |
| 11-024515722-M | G | A | A | A | A | A | A | A | A | A | G | G | G | G | G | G | G | G |
| 11-047224208-M | C | A | A | A | A | A | A | A | A | A | C | C | C | C | C | C | C | C |
| 11-070331570-M | T | C | C | C | C | C | C | C | C | C | T | T | T | T | T | T | T | T |
| 11-090199967-M | T | C | C | C | C | C | C | C | C | C | T | T | T | T | T | T | T | T |
| 11-111226923-M | A | C | C | C | C | C | C | C | C | C | A | A | A | A | A | A | A | A |
| 11-122195777-M | C | T | T | T | T | T | T | T | T | T | C | C | C | C | C | C | C | C |
| 12-003567042-M | G | T | T | T | T | T | T | T | T | T | G | G | G | G | G | G | G | G |
| 12-022232159-M | C | G | G | G | G | G | G | G | G | G | C | C | C | C | C | C | C | C |
| 12-041270227-M | A | G | G | G | G | G | G | G | G | G | A | A | A | A | A | A | A | A |
| 12-061271925-M | A | T | T | T | T | T | T | T | T | T | A | A | A | A | A | A | A | A |

|                |   |   |   |   |   |   |   |   |   |   |   |   |   |   |   |   |   |   |
|----------------|---|---|---|---|---|---|---|---|---|---|---|---|---|---|---|---|---|---|
| 12-069389027-M | A | G | G | G | G | G | G | G | G | G | A | A | A | A | A | A | A | A |
| 12-092440423-M | G | C | C | C | C | C | C | C | C | C | G | G | G | G | G | G | G | G |
| 12-107536049-N | A | G | G | G | G | G | G | G | G | G | A | A | A | A | A | A | A | A |
| 12-112276179-M | A | T | T | T | T | T | T | T | T | T | A | A | A | A | A | A | A | A |
| 13-003966099-M | A | G | G | G | G | G | G | G | G | G | A | A |   | A | A | A | A | A |
| 13-023105764-M | A | G | G | G | G | G | G | G | G | G | A | A | A | A | A | A | A | A |
| 13-043995023-N | T | G | G | G | G | G | G | G | G | G | T | T | T | T | T |   | T | T |
| 13-065339791-N | C | T | T | T | T | T | T | T | T | T | C | C | C | C | C | C | C | C |
| 13-084819885-M | G | A | A | A | A | A | A | A | A | A | G | G | G | G | G | G | G | G |
| 13-101929792-M | C | T | T | T | T | T | T | T | T | T | C | C | C | C | C | C | C | C |
| 13-117094028-M | G | A | A | A | A | A | A | A | A | A | G | G | G | G | G | G | G | G |
| 14-005055006-M | T | A | A | A | A | A | A | A | A | A | T | T | T | T | T | T | T | T |
| 14-024063411-M | A | G | G | G | G | G | G | G | G | G | A | A | A | A | A | A | A | A |
| 14-040017031-M | G | C | C | C | C | C | C | C | C | C | G | G | G | G | G | G | G | G |
| 14-060626617-N | T | C | C | C | C | C | C | C | C | C | T | T | T | T | T | T | T | T |
| 14-077156430-M | C | T | T | T | T | T | T | T | T | T | C | C | C | C | C | C | C | C |
| 14-097042967-M | A | G | G | G | G | G | G | G | G | G | A | A | A | A | A | A | A | A |
| 14-114403652-M | C | T | T | T | T | T | T | T | T | T | C | C | C | C | C | C | C | C |
| 15-003094890-M | A | G | G | G | G | G | G | G | G | G | A | A | A | A | A | A | A | A |
| 15-020280219-M | G | T | T | T | T | T | T | T | T | T | G | G | G | G | G | G | G | G |
| 15-043015319-M | G | C | C | C | C | C | C | C | C | C | G | G | G | G | G | G | G | G |
| 15-059754938-N | C | T | T | T | T | T | T | T | T | T | C | C | C | C | C | C | C | C |
| 15-102788257-N | G | T | T | T | T | T | T | T | T | T | G | G | G | G | G | G | G | G |
| 16-005053446-C | G | T | T | T | T | T | T | T | T | T | G | G | G | G | G | G | G | G |
| 16-019621494-C | A | G | G | G | G | G | G | G | G | G | A | A | A | A | A | A | A | A |
| 16-057482753-C | A | G | G | G | G | G | G | G | G | G | A | A | A | A | G | G | G | G |
| 16-075684315-C | T | C | C | C | C | C | C | C | C | C | T | T | T | T | T | T | T | T |
| 16-096070057-C | C | T | T | T | T | T | T | T | T | T | C | C | C | C | C | C | C | C |
| 17-003335010-M | G | C | C | C | C | C | C | C | C | C | G | G | G | G | G | G | G | G |
| 17-023157746-M | A | T | T | T | T | T | T | T | T | T | A | A | A | A | A | A | A | A |
| 17-043164647-M | G | A | A | A | A | A | A | A | A | A | G | G | G | G | G | G | G | G |
| 17-066532305-N | T | G | G | G | G | G | G | G | G | G | T | T | T | T | T | T | T | T |
| 17-083294998-M | T | A | A | A | A | A | A | A | A | A | T | T | T | T | T | T | T | T |
| 17-092673068-N | T | G | G | G | G | G | G | G | G | G | T | T | T | T | T | T | T | T |
| 18-005066417-M | T | C | C | C | C | C | C | C | C | C | T | T | T | T | T | T | T | T |
| 18-022053385-M | A | G | G | G | G | G | G | G | G | G | A | A | A | A | A | A | A | A |
| 18-043081750-M | C | T | T | T | T | T | T | T | T | T | C |   | C | C | C | C | C | C |
| 18-054835717-M | T | A | A | A | A | A | A | A | A | A | T | T | T | T | T | T | T | T |
| 18-067972780-M | T | C | C | C | C | C | C | C | C | C | T | T | T | T | T | T | T | T |
| 18-078813035-M | A | C | C | C | C | C | C | C | C | C | A | A | A | A | A | A | A | A |
| 18-090060367-M | G | T | T | T | T | T | T | T | T | T | G | G | G | G | G | G | G | G |
| 19-018239318-M | T | G | G | G | G | G | G | G | G | G | T | T | T | T | T | T | T | T |
| 19-021081804-M | A | G | G | G | G | G | G | G | G | G | A | A | A | A | A | A | A | A |
| 19-038092479-M | T | C | C | C | C | C | C | C | C | C | T | T | T | T | T | T | T | T |
| 19-048069669-N | C | T | T | T | T | T | T | T | T | T | C | C | C | C | C | C | C | C |
| 19-060823449-N | A | G | G | G | G | G | G | G | G | G | A | A | A | A | A | A | A | A |
| X-016114535-G  | C | A | A | A | A | A | A | A | A | A | C | C | C | C | C | C | C | C |
| X-025132696-G  | C | G | G | G | G | G | G | G | G | G | C | C | C | C | C | C | C | C |
| X-054650362-N  | T | A | A | A | A | A | A | A | A | A | T | T | T | T | T | T | T | T |
| X-068494838-M  | C | T | T | T | T | T | T | T | T | T | C | C | C | C | C | C | C | C |
| X-087817653-G  | A | T | T | T | T | T | T | T | T | T | A | A | A | A | A | A | A | A |

|               |   |   |   |   |   |   |   |   |   |   |   |   |   |   |   |   |   |   |
|---------------|---|---|---|---|---|---|---|---|---|---|---|---|---|---|---|---|---|---|
| X-100413449-M | T | G | G | G | G | G | G | G | G | G | T | T | T | T | T | T | T | T |
| X-114340727-M | A | G | G | G | G | G | G | G | G | G | A | A | A | A | A | A | A | A |
| X-133535206-G | T | C | C | C | C | C | C | C | C | C | T | T | T | T | T | T | T | T |
| X-143466659-M | A | C | C | C | C | C | C | C | C | C | A | A | A | A | A | A | A | A |
|               |   |   |   |   |   |   |   |   |   |   |   |   |   |   |   |   |   |   |
